# Supplementary material
Source: Springer Nature journal article supplement (https://www.springermedizin.de/resource/supplementary/12873_2010_110_MOESM5_ESM.pdf/9431442)

100-140 cm

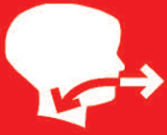

RESP < 10 or > 30

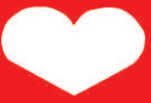

PULSE < 70 or > 140

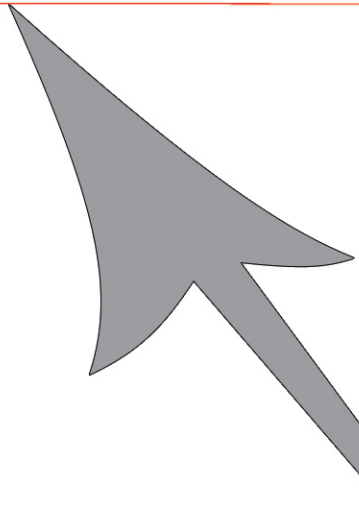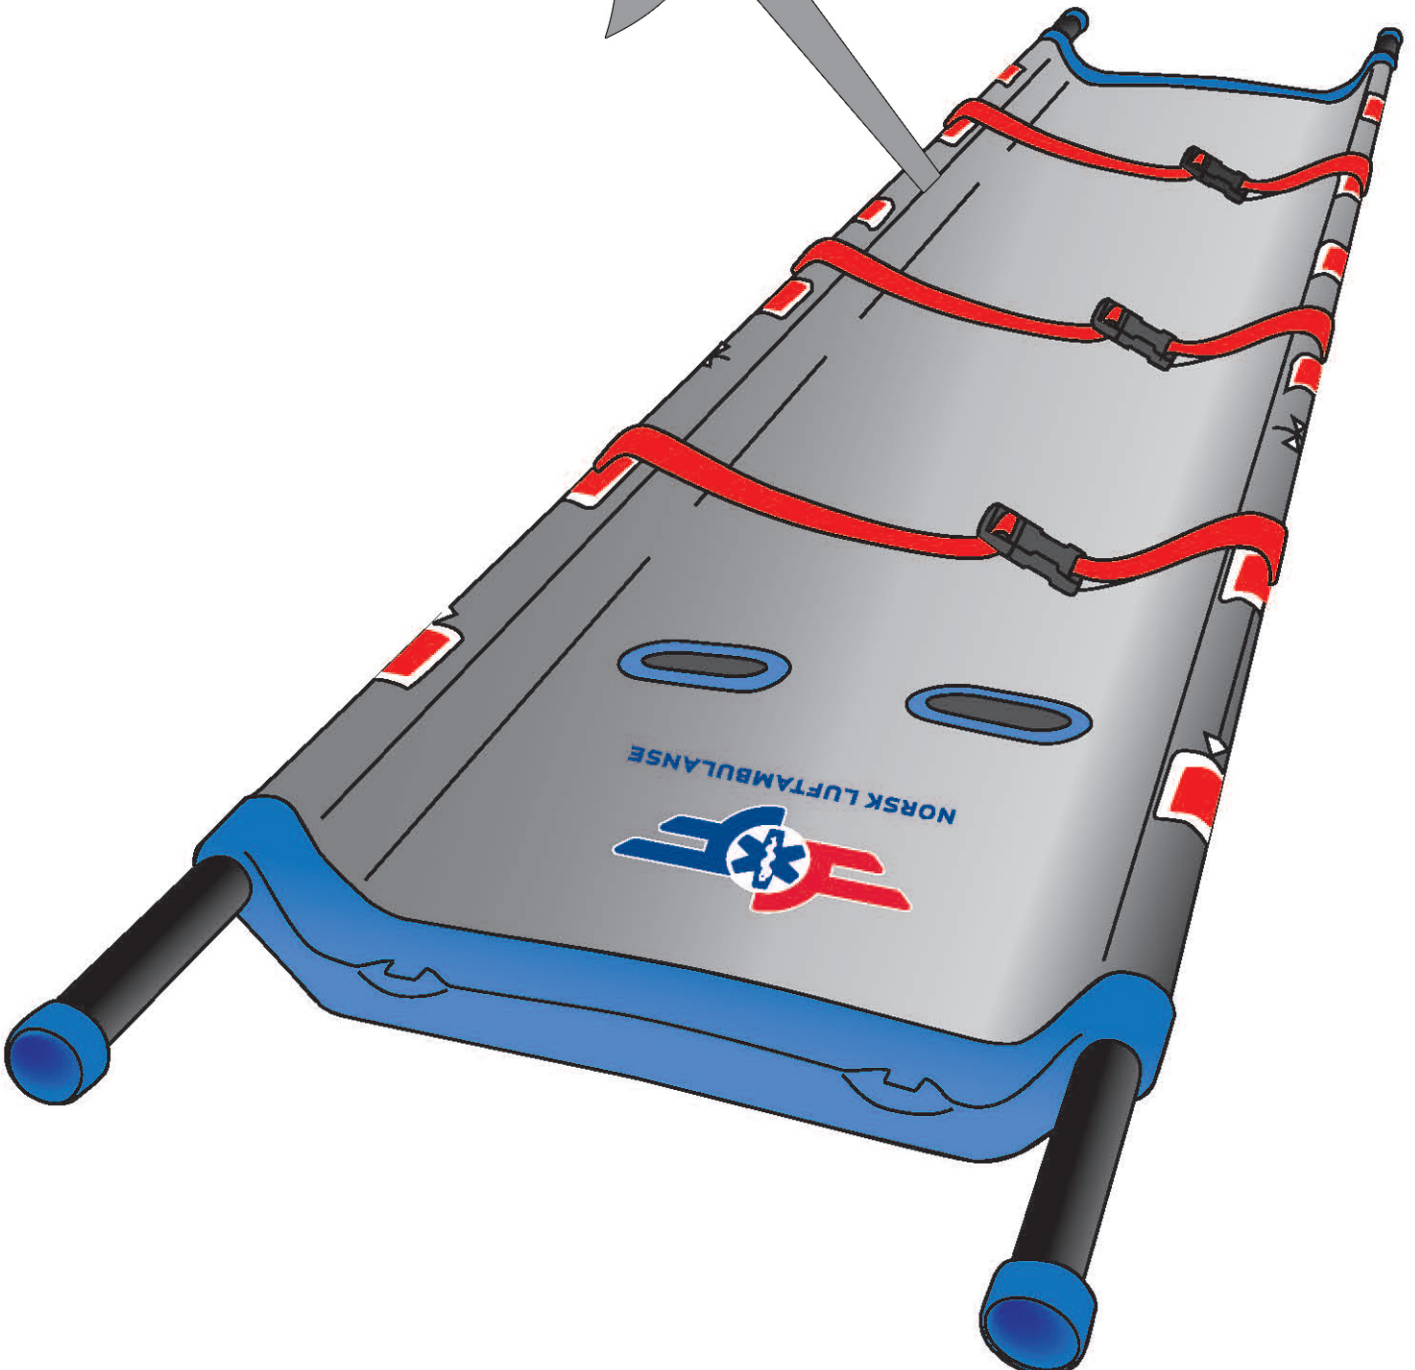

Supplement: MOESM5 [file 9431442]
